# Supplementary material
Source: publisher site journal article supplement (https://www.dovepress.com/article/455942)
Supplement: Supplementary file 1 [file get_supplementary_file.php]

**Supplementary materials**


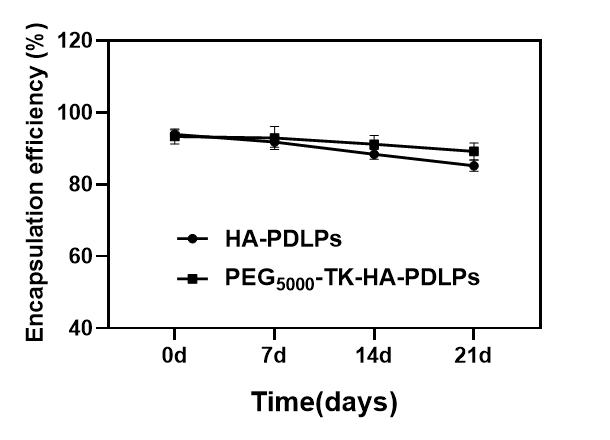


**Figure S1 Stability results of different formulations.**

**
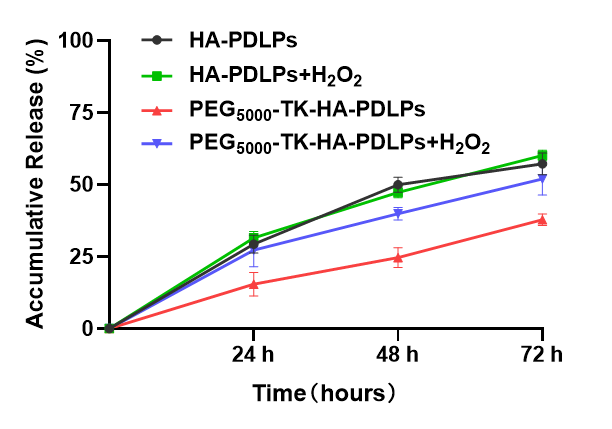
**

**Figure S2 In vitro cumulative release results of different formulations.**
